# Supplementary material for: Primed histone demethylation regulates shoot regenerative competency
Source: Nat Commun. 2019 Apr 16;10:1786. doi: 10.1038/s41467-019-09386-5 (PMC6467990; doi:10.1038/s41467-019-09386-5)
Supplement: Supplementary file 11 — Source Data [file 41467_2019_9386_MOESM11_ESM.xlsx]

## Sheet: Fig. 4e
Source Data Figure 4e
Demethylase activity of LDL3 for H3K4me2
		H3K4me2 raw intensity										H3K4me1				H3K4me2 raw intensity										H3K4me2
		replicate 1		replicate 2		replicate 3		replicate 4				Control	p35S:LDL3-GFP			replicate 1		replicate 2		replicate 3		replicate 4				Control	p35S:mLDL3-GFP
		Control	p35S:LDL3-GFP	Control	p35S:LDL3-GFP	Control	p35S:LDL3-GFP	Control	p35S:LDL3-GFP		Relative intensity	1	0.443007			Control	p35S:mLDL3-GFP	Control	p35S:mLDL3-GFP	Control	p35S:mLDL3-GFP	Control	p35S:mLDL3-GFP		Relative intensity	1	0.965954
		239.182	61.216	151.057	53.11	112.395	57.311	206.032	96.557		Sample number	242	59			295.708	263.442	224.287	113.162	141.86	154.969	113.7	107.974		Sample number	132	34
		563.906	50.612	210.958	110.472	201.223	88.084	251.377	61.611		S.D.	0.44812	0.150101			582.844	508.433	198.611	109.211	58.195	89.062	147.474	107.27		S.D.	0.425981	0.302263
		93.728	242.06	193.555	74.141	163.696	89.978	44.677	53.852		S.E.	0.0288063	0.0195414			447.401	240.863	261.307	103.543	117.614	187.102	138.34	171.33		S.E.	0.0370769	0.0518377
		370.844	107.885	105.306	44.329	153.183	83.619	45.931	41.343		Student's t-test		7.6771e-41			615.868	653.6	57.457	175.778	136.181	136.842	176.389	252.117		Student's t-test		0.598992
		76.193	96.047	268.984	59.189	232.263	74.233	133.424	41.379							786.263	378.085	286.13	164.643	76.462	201.393	224.327	108.92
		296.932	173.282	149.073	86.613	33.819	60.495	44.752	72.454							241.962	380.083	33.663	156.956	115.512		204.652
		472.435	89	239.917	78.099	122.684	63.43	195.192	43.136							239.704	403.798	167.696	147.709	116.303		41.642
		273.839	132.643	48.953	64.902	209.638	77.88	70.911	60.373							237.677	290.606	55.978	147.322	122.712		30.657
		430.461	67.109	95.574	50.931	141.041	74.719	75.538	51.281							240.425	230.443	141.52	93.866	120.359		231.312
		507.918	54.388	180.401	79.441	206.241	98.978	154.823	72.927							240.179	438.129	149.677		211.487		269.592
		232.23	113.038	91.68	95.027	106.391	54.574	112.357	72.889							658.685	322.064	167.451		223.345		33.447
		239.477	63.577	191.595	98.976	216.022	58.807	110.726	43.999							489.638	268.271	195.705		168.011		113.978
		241.175	73.135	104.611	110.173	153.805	57.712	160.099	68.355							379.477	359.342	223.378		180.38		204.712
		241.192	52.825	117.947	64.432	131.581	108.251	145.475	65.363							344.25	393.684	118.221		51.594		40.838
		235.226	195.001	97.874		70.349	108.642	72.425								417.116	236.574	90.58		158.539		226.507
		128.405		92.164		140.533	91.523	210.993								488.359		171.773		179.768		97.639
		187.728		116.218		234.846		86.557								696.143		201.96		167.767		244.002
		229.716		60.347		94.865		184.499								548.299		225.799		185.024		48.898
		89.825		65.646		42.339		200.389								446.085		157.457		176.452		237.115
		458.03		36.147		86.547		103.524								40.811		184.362		101.507		35.866
		133.235		152.042		222.48		124.592								422.506		127.663				259.96
		34.751		38.632		214.81		96.851								491.543		180.752				38.438
		318.214		133.089		74.794		171.807								465.426		117.396				146.75
		422.758		206.457		213.228		118.233								382.675		195.386				226.637
		339.384		136.062		101.356		146.37								278.063		152.941
		278.483		318.86		207.256		128.565								312.48		135.957
		334.36		208.113		173.913		176.088								346.878		252.544
		151.798		315.443		191.968		122.504								313.215		217.995
		107.048		167.389		183.186		30.095								343.79		115.48
		512.744		42.955		102.391		257.558								238.213		204.543
		494.314		127.288		75.215		165.294								127.513		141.979
		314.171		160.581		214.144		165.721								280.792		230.694
		217.78		198.408		89.842		53.682								283.347		198.438
		491.985		246.207		112.834		115.837								132.625		105.405
		332.487		217.487		218.241		36.654								421.695		138.056
		282.078		126.963		169.144		151.638								689.839		38.617
		463.211		215.006		166.398		80.53								317.538		111.697
		558.324		193.022		94.811		64.279								337.406
		313.911		118.998		149.573		137.02								300.586
		128.488		116.714		157.378		132.194								303.046
		317.866		331.452		245.456		43.545								357.297
		214.858		264.261		181.993		105.064								334.116
		112.716		142.049		141.076		211.087								404.253
		147.143		265.069		153.166		291.129								404.057
		196.766		183.962		177.77										244.891
		262.572		94.47		103.064										394.377
		152.639		179.567		210.157										284.673
		280.43		309.743		186.519										184.15
		288.49		111.242		78.008										234.453
		329.357		201.119		216.062										215.168
		179.141		233.427		108.035										232.429
		215.523		230.116		220.726
		111.799		312.815		184.05
		324.987		282.283		169.18
		166.251		125.401		175.324
		449.409		210.763		206.521
		326.414		323.574		162.755
		546.026		244.852		141.57
		436.56		127.698
		467.743		213.22
		434.194		109.148
		131.439		156.021
		261.921		196.974
		229.91		23.263
		221.621		28.239
		546.055		157.628
		165.336
		20.075
		506.3
		545.187
		521.225
		294.12
		274.055
		438.44
	Average	296.683	104.788	168.425	76.4168	155.998	78.0147	130.365	60.3942						Average	363.058	357.828	161.583	134.688	140.454	153.874	147.203	149.522
		H3K4me2 relative intensity														H3K4me2 relative intensity
		replicate 1		replicate 2		replicate 3		replicate 4								replicate 1		replicate 2		replicate 3		replicate 4
		Control	p35S:LDL3-GFP	Control	p35S:LDL3-GFP	Control	p35S:LDL3-GFP	Control	p35S:LDL3-GFP							Control	p35S:mLDL3-GFP	Control	p35S:mLDL3-GFP	Control	p35S:mLDL3-GFP	Control	p35S:mLDL3-GFP
		0.806187	0.206335	0.896878	0.315332	0.720492	0.367384	1.58043	0.740669							0.814494	0.725621	1.38806	0.700335	1.01001	1.10335	0.772403	0.733504
		1.9007	0.170593	1.25253	0.65591	1.28991	0.56465	1.92826	0.472606							1.60538	1.40042	1.22916	0.675884	0.414336	0.634103	1.00184	0.728722
		0.31592	0.815888	1.1492	0.440201	1.04935	0.576791	0.342708	0.413088							1.23231	0.663429	1.61717	0.640806	0.837387	1.33213	0.939791	1.1639
		1.24997	0.363637	0.625238	0.263197	0.981958	0.536028	0.352328	0.317134							1.69634	1.80027	0.355589	1.08785	0.96958	0.974286	1.19827	1.71272
		0.256816	0.323736	1.59705	0.351426	1.48889	0.47586	1.02347	0.31741							2.16567	1.04139	1.7708	1.01894	0.544393	1.43388	1.52393	0.739931
		1.00084	0.584065	0.885098	0.514251	0.216792	0.387795	0.343284	0.55578							0.666456	1.04689	0.208333	0.971367	0.822421		1.39027
		1.59239	0.299984	1.42447	0.463701	0.786449	0.406609	1.49728	0.330888							0.660237	1.11221	1.03783	0.914139	0.828053		0.282888
		0.923002	0.447087	0.290651	0.385346	1.34385	0.499239	0.543944	0.463109							0.654654	0.800441	0.346436	0.911744	0.873684		0.208263
		1.45091	0.226198	0.567456	0.302395	0.904123	0.478976	0.579437	0.393366							0.662223	0.634729	0.875837	0.580917	0.856931		1.57138
		1.71199	0.18332	1.0711	0.471669	1.32208	0.634485	1.18762	0.559408							0.661545	1.20678	0.926319		1.50574		1.83143
		0.782755	0.381006	0.544336	0.564208	0.682005	0.349839	0.861868	0.559117							1.81427	0.887088	1.03632		1.59017		0.227217
		0.807182	0.214293	1.13757	0.587655	1.38478	0.376974	0.849357	0.337508							1.34865	0.738921	1.21118		1.1962		0.774291
		0.812905	0.246509	0.621112	0.654135	0.985945	0.369955	1.22809	0.524338							1.04523	0.989766	1.38244		1.28427		1.39068
		0.812962	0.178052	0.700292	0.382555	0.843481	0.693928	1.11591	0.501386							0.948197	1.08436	0.731645		0.367338		0.277426
		0.792853	0.657271	0.581112		0.450962	0.696434	0.555558								1.1489	0.651616	0.56058		1.12876		1.53874
		0.432802		0.547209		0.900867	0.586695	1.61849								1.34513		1.06307		1.27991		0.663295
		0.632756		0.690026		1.50545		0.663961								1.91745		1.24989		1.19447		1.65759
		0.774281		0.358301		0.608119		1.41525								1.51023		1.39742		1.31733		0.332181
		0.302764		0.389763		0.271408		1.53714								1.22869		0.974468		1.2563		1.6108
		1.54384		0.214617		0.554797		0.794112								0.112409		1.14098		0.722708		0.24365
		0.449082		0.902726		1.42618		0.95572								1.16374		0.790079				1.766
		0.117132		0.229372		1.37701		0.742925								1.3539		1.11864				0.261122
		1.07257		0.790195		0.479456		1.3179								1.28196		0.726539				0.996923
		1.42495		1.22581		1.36687		0.906942								1.05403		1.2092				1.53962
		1.14393		0.807847		0.649728		1.12277								0.765892		0.946519
		0.938655		1.89318		1.32859		0.986196								0.86069		0.841409
		1.12699		1.23564		1.11484		1.35074								0.955435		1.56294
		0.511651		1.87289		1.23058		0.939704								0.862715		1.34912
		0.360816		0.993846		1.17429		0.230853								0.94693		0.714681
		1.72826		0.255039		0.656363		1.97568								0.65613		1.26587
		1.66614		0.755753		0.482155		1.26794								0.35122		0.878678
		1.05895		0.953425		1.37274		1.27121								0.773409		1.42772
		0.73405		1.17802		0.575919		0.411784								0.780447		1.22809
		1.65829		1.46182		0.723306		0.888562								0.3653		0.652329
		1.12068		1.2913		1.399		0.281166								1.16151		0.854399
		0.950773		0.753823		1.08427		1.16318								1.90008		0.238992
		1.5613		1.27656		1.06667		0.61773								0.874622		0.691269
		1.88189		1.14604		0.607773		0.493071								0.929346
		1.05807		0.706532		0.958817		1.05105								0.827929
		0.433082		0.692971		1.00885		1.01403								0.834705
		1.0714		1.96794		1.57346		0.334025								0.984133
		0.724201		1.56901		1.16664		0.805925								0.920284
		0.379921		0.843394		0.904348		1.61921								1.11347
		0.495961		1.57381		0.981849		2.23319								1.11293
		0.66322		1.09225		1.13957										0.674524
		0.885026		0.560901		0.660677										1.08627
		0.514485		1.06615		1.34718										0.784099
		0.945218		1.83905		1.19565										0.50722
		0.972385		0.660482		0.500059										0.645774
		1.11013		1.19411		1.38504										0.592655
		0.603813		1.38594		0.692543										0.640199
		0.726442		1.36628		1.41493
		0.37683		1.85729		1.17983
		1.0954		1.67601		1.0845
		0.560366		0.744549		1.12389
		1.51478		1.25137		1.32387
		1.10021		1.92117		1.04332
		1.84044		1.45377		0.907515
		1.47147		0.758187
		1.57658		1.26596
		1.4635		0.648049
		0.443029		0.926351
		0.882831		1.1695
		0.774935		0.13812
		0.746996		0.167665
		1.84053		0.935892
		0.557282
		0.0676648
		1.70654
		1.83761
		1.75684
		0.991362
		0.92373
		1.47781
	Average	1	0.353198	1	0.453713	1	0.500103	1	0.463272						Average	1	0.985595	1	0.833554	1	1.09555	1	1.01576

## Sheet: Fig. 7d
Source Data Figure 7d			replicate 1						replicate 2						replicate 3								WT	ldl3-1	ldl3-2	cipk23	upl4	glt1
Shoot regeneration phenotype in three mutants for putative LDL3 target genes		No.	WT	ldl3-1	ldl3-2	cipk23	upl4	glt1	WT	ldl3-1	ldl3-2	cipk23	upl4	glt1	WT	ldl3-1	ldl3-2	cipk23	upl4	glt1		Average	14.379	0.525095	0.595085	9.0181	8.11107	8.1684
		1	8	0	1	14	12	9	11	1	1	7	5	10	19	0	1	9	7	6		Replicate 1 relative SAM number /WT (%)	101.157	2.87775	5.79547	71.0359	61.6319	57.862
		2	8	1	0	14	13	4	14	1	0	9	4	10	21	0	0	7	4	7		Replicate 2 relative SAM number /WT (%)	102.87	5.96106	2.60796	59.8093	53.0286	59.2426
		3	13	0	0	12	11	8	9	0	0	9	3	7	14	0	0	4	5	2		Replicate 3 relative SAM number /WT (%)	95.973	2.11661	4.01225	57.3056	54.5666	53.3183
		4	19	0	0	10	11	9	14	3	0	13	11	2	17	0	1	9	6	4		Relative SAM number /WT (%)	100	3.65181	4.13856	62.7169	56.409	56.8077
		5	15	4	4	9	4	10	9	0	1	9	8	10	14	2	0	1	11	12		S.D.	2.93205	1.66219	1.30436	5.97055	3.7461	2.53087
		6	11	0	0	5	6	7	15	2	0	1	2	7	18	0	1	4	24	14		Student's t-test		2.10574e-05	5.77116e-05	0.00465854	0.000284741	0.000108831
		7	10	1	1	9	10	10	16	0	1	7	5	10	19	0	0	7	5	13
		8	27	0	0	12	11	12	21	1	1	6	6	12	13	1	0	6	11	11
		9	17	0	10	18	12	15	25	3	0	9	8	14	12	0	1	9	14	5
		10	18	0	4	13	12	9	13	0	2	14	5	3	17	0	4	6	17	10
		11	12	2	0	11	14	6	18	0	0	10	7	7	11	0	0	10	1	4
		12	13	0	0	11	9	8	16	0	0	10	5	8	14	0	0	1	9	8
		13	20	0	0	11	9	7	18	2	0	9	7	7	9	1	0	13	3	6
		14	14	2	0	3	13	10	20	2	0	7	12	6	13	0	0	5	7	2
		15	16	1	0	10	2	7	15	1	0	6	13	6	15	0	0	5	4	10
		16	10	0	1	11	3	8	17	0	0	9	4	13	13	0	0	6	3	13
		17	20	0	0	8	8	7	11	0	0	11	11	8	9	0	2	8	7	12
		18	10	0	0	16	8	12	9	1	0	7	16	7	14	0	0	12	7	13
		19	16	1	1	7	10	13	10	1	0	12	6	12	8	0	0	12	9	8
		20	17	0	0	6	14	4	17	0	1	6	12	15	14	2	0	10	12	4
		21	12	0	0	17	13	7	16	0	0	8	11	5	14	1	0	7	2	9
		22	14	0	0	3	5	7	12		0	7	6	9	15	0	2	17	8	5
		23		0	0	14	9	8	14		2	9	14	12	13	0	1	19	7	9
		24		0	0	10	8	5	15		0	13	2	12	5		0	10	8	5
		25		0	0	5	16	6				7		2	14		1	9	9	6
		26		0	0	12	11							8			1		4	3
		27		0	0	7	2							8						6
		28		0	1	8	1
		29		0	1		0
		30			1
		Average	14.5455	0.413793	0.833333	10.2143	8.86207	8.32	14.7917	0.857143	0.375	8.6	7.625	8.51852	13.8	0.304348	0.576923	8.24	7.84615	7.66667

## Sheet: Supplementary Figure 1
Source Data Supplementary Figure 1a	The number of cells with WUS expression				Relative SAM size
Phenotypes in shoot meristems after bolting in WT and ldl3	No.	Col	ldl3-1		No.	Col	ldl3-1			Col	ldl3-1
	1	58	61		1	0.97479	1.02521		Relative SAM size	1	0.997479
	2	43	58		2	0.722689	0.97479		S.D.	0.262843	0.208652
	3	50	51		3	0.840336	0.857143		Student's t-test		0.977053
	4	42	51		4	0.705882	0.857143
	5	42	77		5	0.705882	1.29412
	6	58	52		6	0.97479	0.87395
	7	66	56		7	1.10924	0.941176
	8	84	78		8	1.41176	1.31092
	9	54	56		9	0.907563	0.941176
	10	95	47		10	1.59664	0.789916
	11	58	37		11	0.97479	0.621849
	12	64	47		12	1.07563	0.789916
	13		68		13		1.14286
	14		67		14		1.12605
	15		60		15		1.0084
	16		55		16		0.92437
	17		73		17		1.22689
	18		61		18		1.02521
	19		44		19		0.739496
	20		88		20		1.47899
	Average	59.5	59.35		Average	1	0.997479
Source Data Supplementary Figure 1b	The number of cells with WUS expression				Relative SAM size
Phenotypes in shoot meristems before bolting in WT and ldl3	No.	WT	ldl3-1		No.	WT	ldl3-1			WT	ldl3-1
	1	38	21		1	1.31429	0.726316		Relative SAM size	1	1.05356
	2	30	33		2	1.03759	1.14135		S.D.	0.222729	0.401541
	3	27	28		3	0.933835	0.968421		Student's t-test		0.569151
	4	33	23		4	1.14135	0.795489
	5	25	27		5	0.864662	0.933835
	6	39	16		6	1.34887	0.553383
	7	30	17		7	1.03759	0.58797
	8	18	25		8	0.622556	0.864662
	9	29	32		9	1.00301	1.10677
	10	35	19		10	1.21053	0.657143
	11	22	18		11	0.760902	0.622556
	12	31	39		12	1.07218	1.34887
	13	28	24		13	0.968421	0.830075
	14	37	30		14	1.2797	1.03759
	15	30	18		15	1.03759	0.622556
	16	14	52		16	0.484211	1.7985
	17	23	28		17	0.795489	0.968421
	18	37	40		18	1.2797	1.38346
	19	29	23		19	1.00301	0.795489
	20	30	58		20	1.03759	2.00602
	21	25	42		21	0.864662	1.45263
	22	35	20		22	1.21053	0.691729
	23	20	34		23	0.691729	1.17594
	24		56		24		1.93684
	25		39		25		1.34887
	26		30		26		1.03759
	Average	28.913	30.4615		Average	1	1.05356
Source Data Supplementary Figure 1c	RAM size
Phenotypes in root meristems of WT and ldl3	replicate 1	WT	ldl3-1	ldl3-2		replicate 2	WT	ldl3-1	ldl3-2		replicate 3	WT	ldl3-1	ldl3-2			WT	ldl3-1	ldl3-2
	1	255.777	320.21	203.72		1	314.701	362.504	384.028		1	249.754	390.136	382.019		replicate 1	259.431	365.926	305.07
	2	204.052	281.242	148.789		2	274.599	373.079	352.616		2	267.866	372.375	424.12		replicate 2	313.546	375.484	358.345
	3	224.963	319.797	315.149		3	379.343	339.577	355.042		3	330.915	441.279	228.209		replicate 3	282.362	338.258	328.817
	4	261.773	314.688	266.77		4	413.902	295.58	317.908		4	294.19	330.207	215.794		Average	285.113	359.889	330.744
	5	273.643	412.29	319.48		5	206.371	389.226	384.008		5	206.835	365.578	335.589
	6	295.614	406.618	338.092		6	203.084	396.748	373.162		6	213.005	394.905	328.806		Relative meristem size
	7	265.912	388.191	261.615		7	355.994	403.77	407.48		7	347.289	275.376	262.308			WT	ldl3-1	ldl3-2
	8	256.657	382.641	302.261		8	299.705	412.473	368.391		8	327.264	288.99	230.444		replicate 1	0.909923	1.28344	1.07
	9	240.981	401.25	358.256		9	289.647	421.102	279.874		9	321.319	311.891	354.982		replicate 2	1.09973	1.31697	1.25685
	10	255.231	392.207	359.471		10	329.087	356.812	331.887		10	310.053	337.691	374.297		replicate 3	0.990352	1.1864	1.15328
	11	289.611	404.792	388.095		11	356.387	408.043	353.581		11	293.291	267.683	326.184		Average	1	1.26227	1.16004
	12	288.956	367.183	335.79		12	340.758	346.896	392.161		12	226.566	282.987	353.13		S.E.	0.04491	0.0319654	0.0441284
	13			375.49		13	292.127				13			401.467		Student's t-test		0.0177702	0.106568
	14			322.563		14	333.94				14			386.083
	15			322.214		15					15
	16			253.984		16					16
	17			305.251		17					17
	18			314.274		18					18
	Average	259.431	365.926	305.07		Average	313.546	375.484	358.345		Average	282.362	338.258	328.817
	Root length
	replicate 1	WT	ldl3-1	ldl3-2		replicate 2	WT	ldl3-1	ldl3-2		replicate 3	WT	ldl3-1	ldl3-2			WT	ldl3-1	ldl3-2
	1	1.16461	2.32902	2.66325		1	3.13381	3.1979	2.7738		1	2.29177	2.72813	2.36428		replicate 1	2.49073	2.31412	2.60561
	2	2.54179	2.66092	2.66994		2	2.41174	2.49909	2.89334		2	3.17567	3.03602	3.34632		replicate 2	2.80198	2.68679	2.88194
	3	2.65608	3.0272	1.79898		3	3.07199	3.26627	2.66051		3	2.85057	2.87961	2.8548		replicate 3	2.74182	2.83656	3.08967
	4	2.02441	2.80193	3.13156		4	3.65067	2.68939	2.77412		4	2.2241	2.93556	4.15371		Average	2.67818	2.61249	2.85907
	5	3.00159	2.47074	2.69152		5	2.78888	2.94855	2.39449		5	3.54717	2.90601	3.61258
	6	2.77434	2.06578	2.49507		6	1.86622	2.22012	3.35365		6	2.17357	2.44985	3.2269		Relative root length
	7	2.96713	2.07502	2.06353		7	3.12713	2.02843	3.25978		7	3.05885	2.48293	3.4652			WT	ldl3-1	ldl3-2
	8	2.52358	2.65042	3.22755		8	2.77191	3.30382	2.71368		8	2.76869	2.42054	3.64954		replicate 1	0.930009	0.864066	0.972903
	9	2.52924	1.67854	3.23687		9	3.34729	2.07491	3.02645		9	2.64247	2.85739	3.00701		replicate 2	1.04623	1.00321	1.07608
	10	2.61924	2.00249	2.58482		10	2.85884	1.61821	3.03093		10	2.89246	2.88278	3.27291		replicate 3	1.02376	1.05914	1.15365
	11	2.83104	1.56336	2.91421		11	2.73045	3.12426	3.01836		11	2.40458	3.17074	3.28855		Average	1	0.975473	1.06754
	12	1.91287	2.23965	2.4758		12	2.00707	2.93059	3.06562		12	3.25268	3.35712	3.00869		S.E.	0.0290601	0.047353	0.0427441
	13	2.56962	1.6852	3.0289		13	3.18399	3.51174	2.59435		13	2.40393	3.33009	3.74335		Student's t-test		0.736736	0.346099
	14	2.54417	2.76829	2.6316		14	3.26203	2.89043	3.1101		14	3.41053	3.05144	2.91155
	15	2.14329	2.14322	2.66527		15	3.03863	2.41104	3.08823		15	2.43945	2.99158	2.78291
	16	2.52296	3.43464	2.21701		16	2.78814	2.6087	2.60244		16	2.75949	2.4084	3.38909
	17	1.87452	1.37024	2.61643		17	1.86711	1.65753	3.02241		17	2.55078	3.15912	3.09623
	18	2.76282	2.18236	2.15588		18	3.01193	2.87914	2.74448		18	3.27009	2.61021	3.00687
	19	2.35658	3.51233	2.13744		19	2.44965	4.02751	3.09738		19	1.88818	3.02421	2.94654
	20	2.37781	2.1265	2.61589		20	2.3912	3.08975	2.71457		20	2.75608	3.26127	2.7274
	21	2.76244	1.66	2.36234		21	3.13557	3.07078	2.68293		21	3.30162	2.53687	2.61928
	22	2.54636	1.92403	2.28132		22	2.43708	2.14009	2.94075		22	3.05995	3.0167	2.26504
	23	1.89361	3.49531	2.96668		23	3.15821	2.83772	2.69889		23	2.38986	3.27374	2.55658
	24	3.22787	2.24544	2.98295		24	2.77585	2.15591	2.90522		24	2.2912	2.51307	2.97063
	25	2.60602	1.74044	2.70895		25	2.26433	1.9878			25		2.35172	3.38979
	26	3.02497		2.42203		26	3.28751				26		2.07334	3.07341
	27					27	2.83631				27		3.65397	2.99801
	28					28					28		2.06122	3.21635
	29					29					29			2.9519
	30					30					30			2.79472
	Average	2.49073	2.31412	2.60561		Average	2.80198	2.68679	2.88194		Average	2.74182	2.83656	3.08967

## Sheet: Supplementary Figure 2b
Source Data Supplementary Figure 2b
RNA-seq data		LDL3 (AT4G16310)	expression level	Average	Ratio	Ratio_average	SD	count	SE
		RPM_C0_WT_1	20.3114	25.6548	0.791719	1	0.156215	3	0.0901906
		RPM_C0_WT_2	26.6901		1.04035
		RPM_C0_WT_3	29.963		1.16793
		RPM_C14_WT_1	36.3005		1.41495	1.39256	0.271131	3	0.156538
		RPM_C14_WT_2	26.9342		1.04987
		RPM_C14_WT_3	43.9433		1.71287
		RPM_C14S1_WT_1	49.5539		1.93156	1.76926	0.143377	3	0.0827787
		RPM_C14S1_WT_2	46.0083		1.79336
		RPM_C14S1_WT_3	40.6078		1.58285
		RPM_C14S7_WT_1	23.8727		0.930533	0.92494	0.0398945	3	0.0230331
		RPM_C14S7_WT_2	24.9048		0.970763
		RPM_C14S7_WT_3	22.4101		0.873523

## Sheet: Supplemenytary Figure 6
Source Data Supplementary Figure 6b
Demethylase activity of LDL3 for H3K4me1
		H3K4me1 raw intensity										H3K4me1				H3K4me1 raw intensity										H3K4me1
		replicate 1		replicate 2		replicate 3		replicate 4				Control	p35S:LDL3-GFP			replicate 1		replicate 2		replicate 3		replicate 4				Control	p35S:mLDL3-GFP
		Control	p35S:LDL3-GFP	Control	p35S:LDL3-GFP	Control	p35S:LDL3-GFP	Control	p35S:LDL3-GFP		Relative intensity	1	0.906956			Control	p35S:mLDL3-GFP	Control	p35S:mLDL3-GFP	Control	p35S:mLDL3-GFP	Control	p35S:mLDL3-GFP		Relative intensity	1	1.00362
		1335.04	714.902	431.174	561.676	316.025	173.593	287.342	222.064		Sample number	269	65			270.423	598.13	567.5	146.484	598.503	522.222	502.271	437.046		Sample number	149	37
		785.83	707.17	453.888	220.513	222.417	87.055	409.627	103.964		S.D.	0.529234	0.348718			643.667	673.878	334.337	486.121	621.598	175.449	657.067	417.712		S.D.	0.531124	0.363138
		1213.02	823.363	587.997	384.012	242.931	116.101	355.193	102.227		S.E.	0.032268	0.0432532			723.732	594.46	516.325	252.605	345.91	194.074	27.108	361.933		S.E.	0.0435113	0.0596995
		833.987	722.142	36.98	510.247	169.55	150.11	119.192	228.086		Student's t-test		0.0886017			669.623	789.991	446.264	318.101	418.035	316.917	575.068	109.647		Student's t-test		0.961465
		510.526	238.98	476.305	270.452	191.233	128.028	304.468	125.697							570.412	766.527	520.164	239.375	34.257	134.157	198.161	306.807
		950.146	724.929	533.001	191.451	221.208	132.745	95.896	271.635							1149.93	309.884	513.998	377.784	292.565	246.497	529.611
		1101.07	581.337	457.673	216.05	196.996	111.391	39.93	285.009							252.071	676.692	528.032	280.511	215.403		454.572
		711.429	725.99	34.171	157.696	269.459	131.379	184.248	231.095							694.528	274.901	279.089		84.674		64.181
		1103.73	613.672	420.847	226.776	199.874	129.48	330.821	183.175							117.297	666.572	743.942		281.056		105.036
		464.767	216.222	703.243	308.994	163.823	71.436	275.322	88.095							477.958	333.3	676.857		365.361		72.267
		785.744	522.546	656.466	235.908	137.8	84.799	329.79	171.146							388.916	534.087	299.134		62.135		476.758
		404.664	492.701	375.174	166.464	133.641	302.332	267.688	200.977							786.689	813.311	350.964		55.716		477.234
		939.415	775.231	629.307	237.556	148.038	144.221	171.992	38.469							652.933	248.902	369.762		32.666		333.131
		737.553	484.212	301.914	297.777	192.846	128.129	67.987								905.348	726.325	395.353		360.671		32.123
		1248.18	611.126	797.827	196.236	149.709	185.119	153.565								660.039	602.029	368.036		538.057		46.807
		618.65	574.995	448.397	150.935	179.698	93.842	43.315								230.976	527.341	393.566		54.52		304.634
		833.055	810.813	33.621		212.404	90.862	47.76								737.368	786.249	72.046		443.838		204.24
		813.47	765.442	660.036		184.283	174.328	272.424								87.13	552.635	234.415		379.077		469.34
		378.98		92.494		196.512		238.499								186.579	582.138	481.701		29.896		43.185
		500.269		547.843		172.5		330.325								100.454		428.479		272.895
		574.083		683.715		159.343		198.797								824.248		321.95		294.718
		248.853		501.636		99.544		179.763								650.816		424.278		274.546
		81.092		283.873		120.077		49.733								854.017		170.619		299.958
		674.487		269.98		102.122		171.859								587.871		198.478		207.684
		603.254		259.08		31.106		167.142								766.95		391.574		361.996
		455.273		167.926		109.899		133.191								576.311		69.758		364.468
		482.018		285.314		34.69		348.702								716.008		325.871		77.052
		534.906		268.826		123.668		381.204								529.797		31.815		371.876
		46.489		263.46		79.729		376.987								815.225		325.546		85.136
		343.285		165.612		112.287		44.746								813.034		301.389
		521.423		274.157		131.439		39.755								697.962		364.323
		304.885		37.948		42.194		462.611								645.018		268.176
		373.73		27.549		281.777		317.387								157.457		304.461
		211.705		165.971		262.159		478.438								497.951		434.671
		1276.97		327.755		157.834		40.474								435.863
		900.121		289.038		222.915		132.367								591.359
		1224.24		355.474		184.911		196.988								388.413
		952.154		407.579		79.656		219.941								400.779
		1116.2		228.674		186.182		275.63								421.544
		1207.05		219.407		194.327		33.84								687.99
		752.072		102.171		197.333		189.349								663.599
		411.108		365.15		156.38		261.891								350.308
		165.629		363.008		155.985		109.956								782.266
		294.26		361.125		197.474		217.562								771.052
		458.354		210.123		202.974		40.492								782.571
		367.161		198.75		244.014		435.088								307.269
		419.106		184.898		98.27		373.103								483.539
		222.123		206.17		176.571		156.978								70.225
		90.367		156.254		165.703										344.465
		40.967		360.918		176.654										148.613
		467.137		363.235		216.624										779.763
		473.478		76.727		24.334										714.534
		413.761		204.362		162.165										527.341
		532.979		265.411		118.554										318.469
		609.428		35.748		136.759										245.402
		482.756		100.46		132.509										114.287
		653.208		36.849		138.893										253.249
		665.519		277.968		153.187										859.923
		771.882		251.304		173.936										1138.81
		824.698		324.996		166.158										896.641
		785.853		314.828		129.548										624.164
		624.489		334.641		208.911										576.524
		590.359		31.838		127.366										593.271
		864.984		77.488												172.565
		269.71		166.492												670.182
		304.866		233.144												721.186
		307.761		22.481												880.94
		475.754		213.481
		324.908		213.449
		616.656
		481.584
		472.658
		66.585
		362.662
		349.99
		374.551
		615.586
		669.175
		698.499
		563.613
		490.451
		719.618
		527.165
		229.991
		930.922
		441.155
		323.766
		909.801
		654.496
	Average	590.622	616.987	292.968	270.796	163.129	135.275	215.82	173.203						Average	554.565	581.966	366.261	300.14	269.802	264.886	293.305	326.629
		H3K4me1 relative intensity														H3K4me1 relative intensity
		replicate 1		replicate 2		replicate 3		replicate 4								replicate 1		replicate 2		replicate 3		replicate 4
		Control	p35S:LDL3-GFP	Control	p35S:LDL3-GFP	Control	p35S:LDL3-GFP	Control	p35S:LDL3-GFP							Control	p35S:mLDL3-GFP	Control	p35S:mLDL3-GFP	Control	p35S:mLDL3-GFP	Control	p35S:mLDL3-GFP
		2.2604	1.21042	1.47174	1.91719	1.93727	1.06415	1.3314	1.02893							0.487631	1.07856	1.54944	0.399944	2.2183	1.93557	1.71245	1.49007
		1.33051	1.19733	1.54927	0.752686	1.36344	0.533658	1.898	0.481716							1.16067	1.21515	0.912838	1.32725	2.3039	0.650287	2.24022	1.42416
		2.05379	1.39406	2.00703	1.31076	1.4892	0.711714	1.64578	0.473668							1.30505	1.07194	1.40972	0.689686	1.28209	0.719319	0.0924226	1.23398
		1.41205	1.22268	0.126225	1.74165	1.03936	0.920194	0.552275	1.05683							1.20747	1.42452	1.21843	0.868509	1.54941	1.17463	1.96065	0.373833
		0.864387	0.404624	1.62579	0.923145	1.17228	0.784828	1.41075	0.582416							1.02858	1.38221	1.4202	0.653564	0.126971	0.497242	0.675614	1.04603
		1.60872	1.2274	1.81931	0.653487	1.35603	0.813744	0.444333	1.25862							2.07357	0.558788	1.40337	1.03146	1.08437	0.913621	1.80567
		1.86426	0.984279	1.56219	0.737452	1.20761	0.682841	0.185015	1.32059							0.454538	1.22022	1.44168	0.765877	0.798373		1.54983
		1.20454	1.2292	0.116637	0.53827	1.65182	0.80537	0.853712	1.07078							1.25238	0.495706	0.761995		0.313837		0.21882
		1.86876	1.03903	1.43649	0.774064	1.22525	0.793729	1.53286	0.84874							0.211512	1.20197	2.03118		1.04171		0.358112
		0.786911	0.366092	2.40041	1.0547	1.00426	0.437912	1.2757	0.408187							0.861861	0.601012	1.84802		1.35418		0.246389
		1.33037	0.884739	2.24074	0.805234	0.844732	0.519829	1.52808	0.793004							0.701299	0.963074	0.816724		0.230298		1.62547
		0.685149	0.834207	1.2806	0.568198	0.819237	1.85333	1.24033	0.931225							1.41857	1.46658	0.958235		0.206507		1.62709
		1.59055	1.31257	2.14804	0.81086	0.907492	0.884093	0.796924	0.178246							1.17738	0.448824	1.00956		0.121074		1.13578
		1.24877	0.819834	1.03054	1.01641	1.18217	0.785447	0.315017								1.63254	1.30972	1.07943		1.3368		0.109521
		2.11332	1.03472	2.72326	0.66982	0.917736	1.1348	0.711542								1.19019	1.08559	1.00485		1.99426		0.159585
		1.04746	0.973542	1.53053	0.515193	1.10157	0.575264	0.2007								0.4165	0.95091	1.07455		0.202074		1.03863
		1.41047	1.37281	0.11476		1.30206	0.556996	0.221296								1.32963	1.41778	0.196707		1.64505		0.69634
		1.37731	1.29599	2.25293		1.12968	1.06865	1.26227								0.157114	0.99652	0.640022		1.40502		1.60018
		0.641663		0.315714		1.20464		1.10508								0.336442	1.04972	1.31519		0.110807		0.147236
		0.847021		1.86997		1.05745		1.53056								0.18114		1.16987		1.01146
		0.971997		2.33375		0.976793		0.921124								1.4863		0.879018		1.09235
		0.421341		1.71225		0.610218		0.83293								1.17356		1.1584		1.01758
		0.137299		0.968955		0.736088		0.230437								1.53998		0.46584		1.11177
		1.14199		0.921534		0.626021		0.796307								1.06006		0.541903		0.769764
		1.02139		0.884328		0.190684		0.774451								1.38298		1.06911		1.34171
		0.770837		0.573189		0.673695		0.617139								1.03921		0.19046		1.35087
		0.816119		0.973874		0.212654		1.61571								1.29112		0.889724		0.285587
		0.905666		0.917595		0.758101		1.76631								0.955338		0.0868643		1.37833
		0.0787119		0.899279		0.488749		1.74677								1.47003		0.888836		0.31555
		0.581226		0.56529		0.688334		0.20733								1.46608		0.82288
		0.882837		0.935791		0.805738		0.184204								1.25858		0.994709
		0.51621		0.129529		0.258655		2.1435								1.16311		0.732199
		0.632774		0.0940341		1.72733		1.47061								0.283929		0.831268
		0.358444		0.566516		1.60707		2.21684								0.897913		1.18678
		2.16208		1.11874		0.967543		0.187536								0.785955
		1.52402		0.986585		1.3665		0.613321								1.06635
		2.0728		1.21335		1.13353		0.912742								0.700392
		1.61212		1.39121		0.488302		1.01909								0.722691
		1.88987		0.780542		1.14132		1.27713								0.760135
		2.0437		0.748911		1.19125		0.156797								1.24059
		1.27336		0.348744		1.20968		0.877347								1.19661
		0.69606		1.24638		0.95863		1.21347								0.631681
		0.280432		1.23907		0.956208		0.50948								1.41059
		0.498221		1.23264		1.21054		1.00807								1.39037
		0.776053		0.717221		1.24426		0.187619								1.41114
		0.621651		0.678401		1.49584		2.01598								0.554072
		0.709601		0.63112		0.602408		1.72877								0.871925
		0.376083		0.703728		1.0824		0.727356								0.126631
		0.153003		0.533348		1.01578										0.621145
		0.0693625		1.23194		1.08291										0.267981
		0.790924		1.23984		1.32793										1.40608
		0.80166		0.261895		0.149171										1.28846
		0.700551		0.697557		0.994092										0.95091
		0.902403		0.905938		0.726751										0.574268
		1.03184		0.12202		0.83835										0.442513
		0.817369		0.342904		0.812297										0.206084
		1.10597		0.125778		0.851432										0.456663
		1.12681		0.948799		0.939056										1.55063
		1.3069		0.857786		1.06625										2.05351
		1.39632		1.10932		1.01857										1.61684
		1.33055		1.07462		0.794146										1.1255
		1.05734		1.14224		1.28065										1.0396
		0.999555		0.108674		0.78077										1.0698
		1.46453		0.264493												0.311172
		0.456654		0.568294												1.20848
		0.516178		0.7958												1.30045
		0.52108		0.0767353												1.58852
		0.805514		0.728683
		0.550112		0.728574
		1.04408
		0.815385
		0.800272
		0.112737
		0.614034
		0.592579
		0.634164
		1.04227
		1.133
		1.18265
		0.95427
		0.830398
		1.21841
		0.892559
		0.389405
		1.57617
		0.746933
		0.548178
		1.54041
		1.10815
	Average	1	1.04464	1	0.92432	1	0.829253	1	0.802535						Average	1	1.04941	1	0.819471	1	0.981778	1	1.11362
Source Data Supplementary Figure 6d
Demethylase activity of LDL3 for H3K4me3
		H3K4me3 raw intensity										H3K4me3				H3K4me3 raw intensity										H3K4me3
		replicate 1		replicate 2		replicate 3		replicate 4				Control	p35S:LDL3-GFP			replicate 1		replicate 2		replicate 3		replicate 4				Control	p35S:mLDL3-GFP
		Control	p35S:LDL3-GFP	Control	p35S:LDL3-GFP	Control	p35S:LDL3-GFP	Control	p35S:LDL3-GFP		Relative intensity	1	0.756089			Control	p35S:mLDL3-GFP	Control	p35S:mLDL3-GFP	Control	p35S:mLDL3-GFP	Control	p35S:mLDL3-GFP		Relative intensity	1	0.912313
		343.894	227.215	1347.78	984.134	123.903	118.885	90.185	44.808		Sample number	220	53			726.671	674.516	917.753	692.782	94.209	89.487	436.7	238.038		Sample number	106	27
		361.946	199.423	1223.29	1072.27	67.851	83.288	73.754	59.666		S.D.	0.466131	0.313848			146.415	109.893	669.025	555.302	161.062	124.852	217.994	231.273		S.D.	0.578088	0.613232
		544.468	291.17	1357.3	719.839	157.657	63.818	110.083	127.446		S.E.	0.0314265	0.0431103			107.812	229.943	1079.63	798.552	119.384	197.683	207.331	348.67		S.E.	0.0561489	0.118017
		256.005	523.907	1643.53	1141.87	191.445	98.15	34.559	122.466		Student's t-test		1.41001e-05			646.624	1064.52	739.673	902.592	230.617	144.74	135.456	221.659		Student's t-test		0.513145
		567.966	383.355	1166.34	1387.04	77.528	90.739	33.934	80.808							156.502	145.651	786.743	481.862	198.738		133.096
		433.453	291.071	1034.44	815.114	183.708	61.983	165.82	108.279							63.185	400.634	719.571	284.104	210.757		196.85
		627.557	594.042	1148.69	525.578	263.25	55.542	164.709	133.674							171.974	179.952	170.118	559.56	265.523		343.444
		536.102	172.31	977.187	536.897	185.662	74.514	50.133	177.096							127.244	232.365	1234.33	263.568	202.77		495.703
		434.314	310.716	1972.89	1006.43	173.953	110.563	49.658	118.236							175.431	158.466	992.891	711.622	96.55		237.881
		371.669	275.01	2220.03	489.378	174.154	61.793	55.237	122.314							165.98	112.331	1080.92		234.368		318.342
		630.114	283.587	1646.41	540.11	107.366	240.114	31.561	101.923							203.615		1006.86		215.3		410.28
		1032.58	299.629	2120.31	1324.01	82.439	89.249	178.072	104.144							1038.83		1325.94		145.188		94.892
		397.86	350.891	2416.37	940.422	66.508		221.3	128.101							978.661		824.928				465.554
		235.214	187.389	181.14	537.678	131.724		158.856								790.397		438.277				158.25
		532.376		208.6		200.775		69.042								193.37		402.342				446.944
		583.981		912.404		142.644		80.513								203.742		808.623				94.106
		488.659		1325.34		232.447		123.59								727.591		852.157				324.475
		506.66		1113.59		127.422		205.197								542.273		780.906				121.809
		563.31		335.429		97.768		199.871								666.931		308.508				147.424
		179.332		990.174		185.886		280.688								407.143		850.272
		744.836		747.303		130.887		61.902								344.909		664.679
		537.252		1049.47		76.751		233.496								198.252		315.55
		660.025		531.221		47.517		191.373								280.082		784.42
		588.023		930.162		94.485		145.849								269.29		358.792
		394.004		535.45		119.751		267.25								164.703		1052.91
		896.031		778.93		118.754		298.821								315.665		690.164
		416.612		547.589		52.363		183.993								308.634		608.601
		463.612		880.768		85.284		110.345								165.95		874.728
		1033.1		323.28		132.644		157.94								216.45		557.021
		877.776		564.949		112.017		38.924								260.406		502.3
		277.012		693.159		196.03		176.489								208.965		344.058
		974.363		437.486		158.077		251.218								182.408		530.4
		536.355		1217.73		157.643		110.863								210.921		752.779
		525.547		1055.77		81.307		82.854								115.065		460.004
		971.895		181.14		211.108		120.808								151.294		1044.2
		727.862		408.329		102.31		173.262								83.534		1057.05
		242.95		581.067		101.172		147.848								148.072		727.728
		866.497		872.811		86.072		171.946								122.477
		308.686		200.631		79.744		220.038
		498.279		716.29		125.173		79.673
		380.748		683.765		248.288		165.729
		615.875		900.374		171.572		204.896
		265.953		372.883		178.348		123.077
		226.321		281.788		106.857		142.211
		649.064		481.401		165.496		83.823
		444.395		421.827				208.893
		529.775		371.464				199.169
		358.341		536.497				265.337
		596.323		1395.47				187.245
		362.207		487.531
		620.694		1519.36
		315.333		892.753
		588.674		1173.71
		383.945		1155.9
		642.343		620.513
		575.728		698.591
		336.06		699.046
		789.263		1063.01
		281.302
		445.33
		257.816
		345.337
		700.056
		303.275
		357.022
		287.551
		526.394
		554.938
	Average	513.356	313.551	902.597	858.626	135.861	95.7198	146.572	109.92						Average	315.46	330.827	738.239	583.327	181.206	139.19	262.449	259.91
		H3K4me3 relative intensity														H3K4me3 relative intensity
		replicate 1		replicate 2		replicate 3		replicate 4								replicate 1		replicate 2		replicate 3		replicate 4
		Control	p35S:LDL3-GFP	Control	p35S:LDL3-GFP	Control	p35S:LDL3-GFP	Control	p35S:LDL3-GFP							Control	p35S:mLDL3-GFP	Control	p35S:mLDL3-GFP	Control	p35S:mLDL3-GFP	Control	p35S:mLDL3-GFP
		0.669893	0.442607	1.49322	1.09034	0.911984	0.875049	0.615294	0.305706							2.30353	2.1382	1.24316	0.938425	0.519901	0.493843	1.66394	0.906988
		0.705058	0.388469	1.3553	1.18798	0.499415	0.613039	0.503193	0.407076							0.464132	0.348358	0.906244	0.752198	0.888836	0.689008	0.830615	0.881211
		1.0606	0.567189	1.50377	0.79752	1.16043	0.46973	0.75105	0.869511							0.341762	0.728914	1.46244	1.0817	0.658832	1.09093	0.789986	1.32852
		0.498689	1.02055	1.82088	1.26509	1.40913	0.72243	0.235782	0.835534							2.04978	3.37451	1.00194	1.22263	1.27268	0.798762	0.516123	0.844579
		1.10638	0.746762	1.2922	1.53672	0.570643	0.667882	0.231517	0.551319							0.496108	0.461711	1.0657	0.652718	1.09675		0.507131
		0.844351	0.566996	1.14607	0.903076	1.35218	0.456224	1.13132	0.738742							0.200295	1.27	0.974713	0.38484	1.16308		0.75005
		1.22246	1.15717	1.27265	0.582295	1.93764	0.408815	1.12374	0.912002							0.545154	0.570444	0.230438	0.757966	1.46531		1.30861
		1.04431	0.335654	1.08264	0.594836	1.36656	0.548458	0.342036	1.20825							0.403361	0.736592	1.67199	0.357023	1.11901		1.88876
		0.846028	0.605264	2.18579	1.11504	1.28038	0.813796	0.338796	0.806675							0.556112	0.502334	1.34494	0.963945	0.53282		0.906389
		0.723998	0.53571	2.4596	0.542189	1.28186	0.454826	0.376859	0.834497							0.526153	0.356087	1.46419		1.29338		1.21297
		1.22744	0.552417	1.82408	0.598395	0.790264	1.76735	0.215327	0.695378							0.645455		1.36387		1.18815		1.56328
		2.01143	0.583667	2.34912	1.46689	0.60679	0.656915	1.21491	0.710531							3.29306		1.79609		0.801234		0.361564
		0.775017	0.683523	2.67713	1.04191	0.48953		1.50984	0.873979							3.10233		1.11743				1.77388
		0.458188	0.365027	0.200687	0.595701	0.969551		1.08381								2.50554		0.593679				0.602974
		1.03705		0.231111		1.4778		0.471045								0.612979		0.545002				1.70297
		1.13757		1.01086		1.04993		0.549306								0.645858		1.09534				0.358569
		0.95189		1.46836		1.71092		0.843203								2.30645		1.15431				1.23634
		0.986956		1.23376		0.937886		1.39997								1.71899		1.0578				0.464124
		1.09731		0.371626		0.719618		1.36364								2.11416		0.417897				0.561724
		0.349332		1.09703		1.36821		1.91502								1.29063		1.15176
		1.45091		0.827947		0.96339		0.422331								1.09335		0.900357
		1.04655		1.16272		0.564923		1.59305								0.628455		0.427436
		1.28571		0.588547		0.349747		1.30566								0.887854		1.06256
		1.14545		1.03054		0.695454		0.995066								0.853643		0.486011
		0.767506		0.593232		0.881424		1.82333								0.522105		1.42624
		1.74544		0.862987		0.874085		2.03873								1.00065		0.934879
		0.811545		0.606681		0.385416		1.25531								0.978363		0.824395
		0.9031		0.975815		0.62773		0.752838								0.526058		1.18488
		2.01244		0.358166		0.976322		1.07756								0.686142		0.754526
		1.70988		0.625915		0.824498		0.265562								0.825481		0.680403
		0.539609		0.76796		1.44287		1.20411								0.662415		0.466052
		1.89802		0.484697		1.16352		1.71395								0.578229		0.718466
		1.0448		1.34915		1.16033		0.756372								0.668615		1.0197
		1.02375		1.1697		0.598458		0.565278								0.364754		0.62311
		1.89322		0.200687		1.55385		0.824222								0.479599		1.41445
		1.41785		0.452393		0.75305		1.18209								0.264801		1.43185
		0.473258		0.643772		0.744673		1.0087								0.469385		0.985762
		1.68791		0.966999		0.63353		1.17312								0.388249
		0.601309		0.222282		0.586953		1.50123
		0.97063		0.793588		0.921332		0.543575
		0.741683		0.757553		1.82752		1.1307
		1.1997		0.997537		1.26285		1.39792
		0.518067		0.413122		1.31273		0.839703
		0.440865		0.312197		0.786518		0.970246
		1.26435		0.533351		1.21813		0.571889
		0.865666		0.467348				1.42519
		1.03198		0.41155				1.35885
		0.698035		0.594392				1.81028
		1.16162		1.54606				1.27749
		0.705566		0.540142
		1.20909		1.68332
		0.614257		0.989093
		1.14672		1.30037
		0.747911		1.28064
		1.25126		0.687475
		1.1215		0.773979
		0.654633		0.774483
		1.53746		1.17772
		0.547966
		0.867487
		0.502216
		0.672704
		1.36368
		0.590769
		0.695466
		0.560139
		1.0254
		1.081
	Average	1	0.610786	1	0.951284	1	0.704543	1	0.749938						Average	1	1.04872	1	0.79016	1	0.768136	1	0.990326
